# Supplementary figures and images for: NLRP12 suppresses hepatocellular carcinoma via downregulation of cJun N-terminal kinase activation in the hepatocyte
Source: eLife journal article supplement (doi:10.7554/elife.40396), 2019-04-15

Figure 1-figure supplement 1

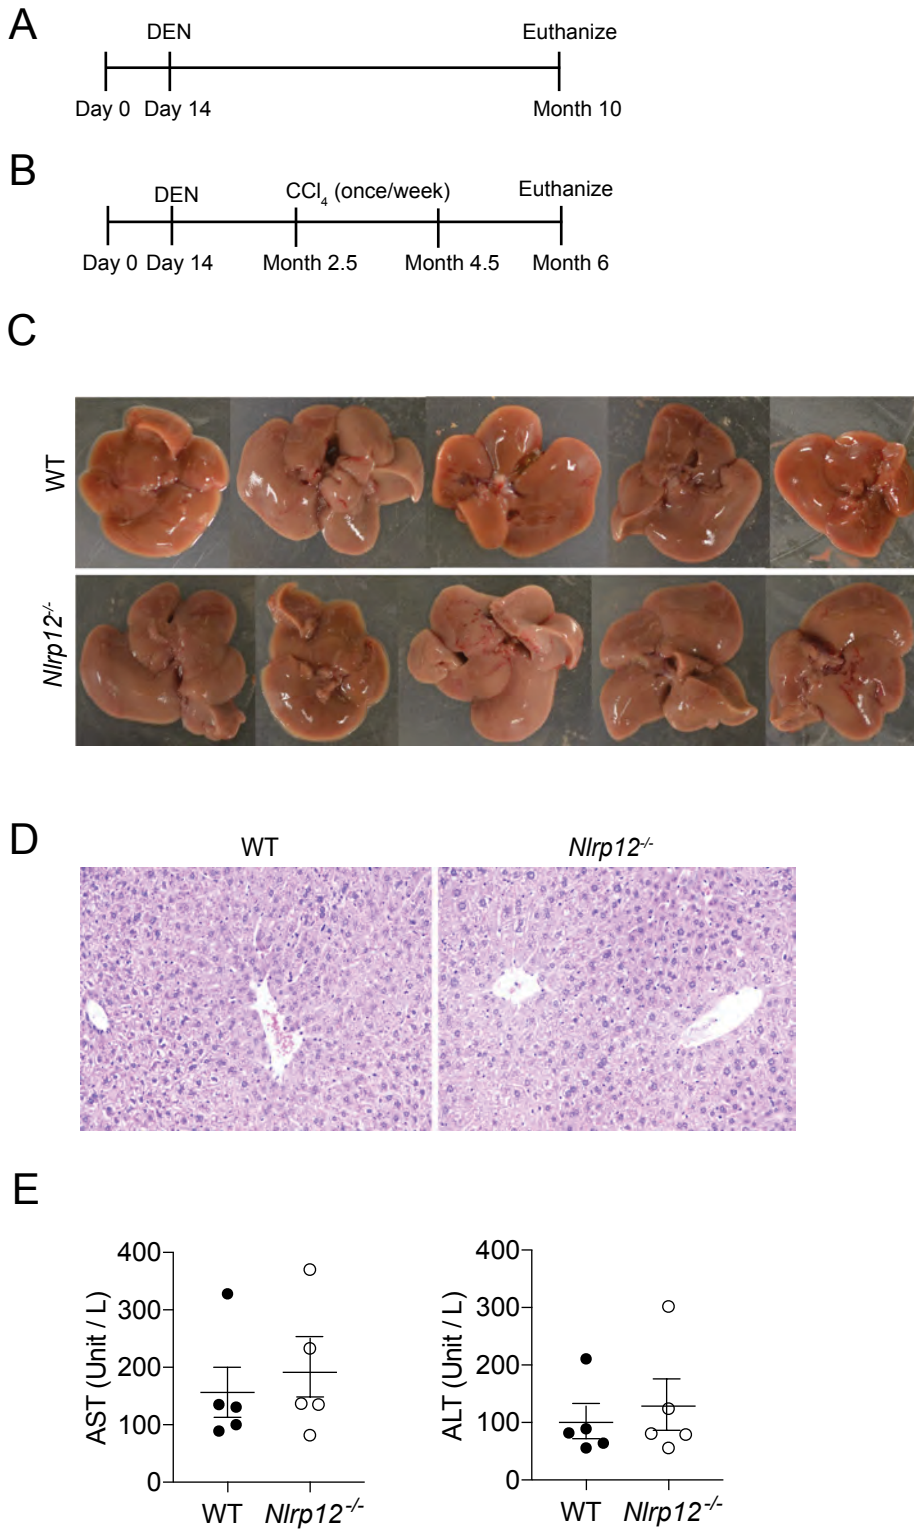

Supplement: supp [file elife-40396-supp-v1.zip]

Figure 4-figure supplement 1

A

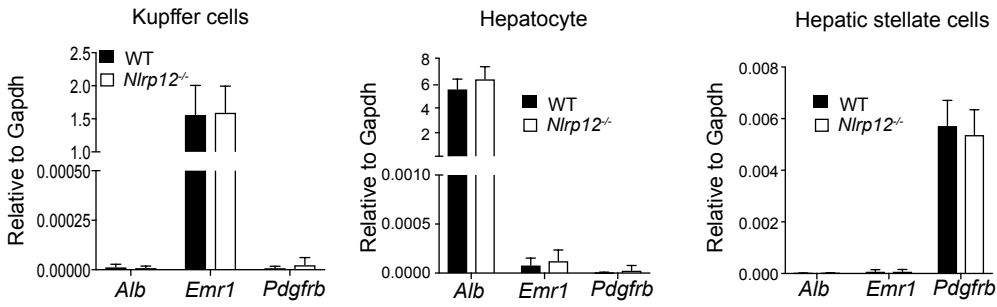

B

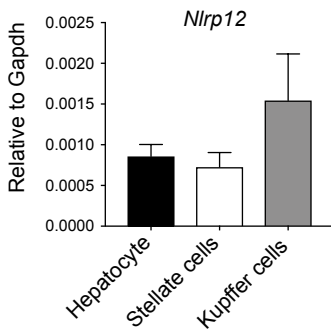

C

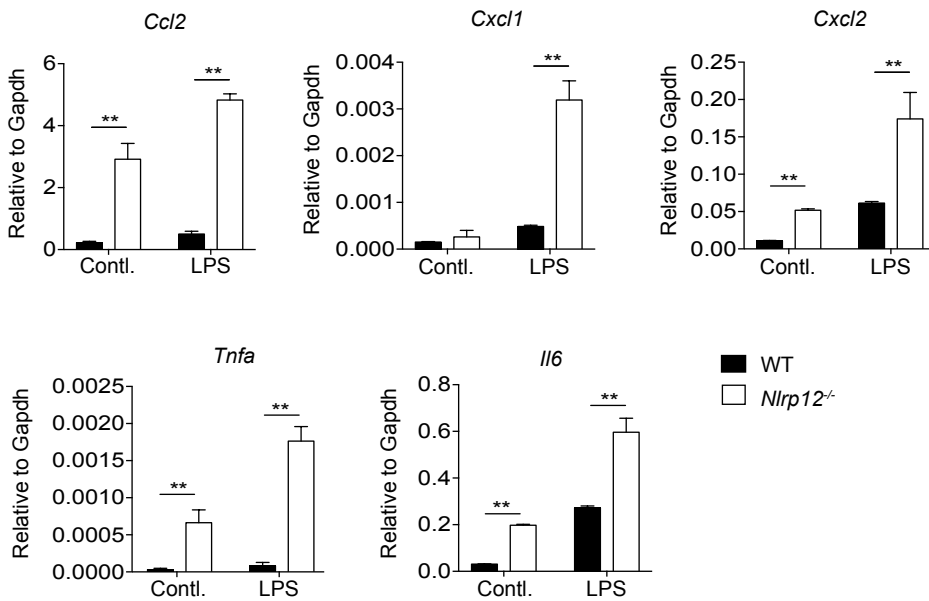

Supplement: supp [file elife-40396-supp-v1.zip]

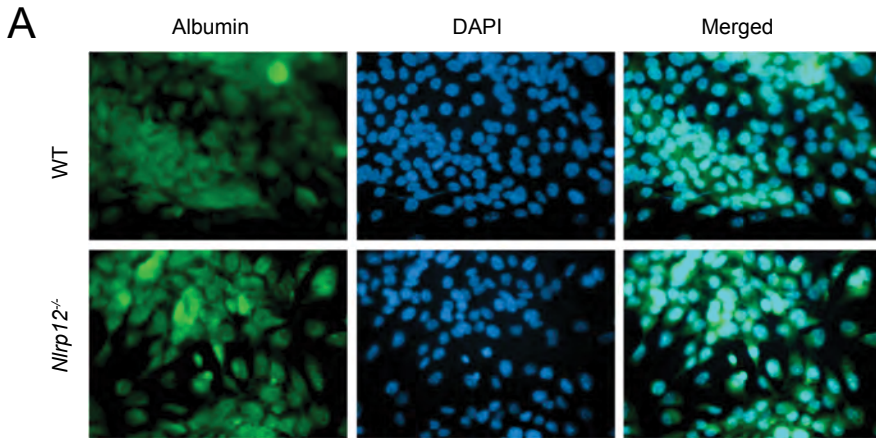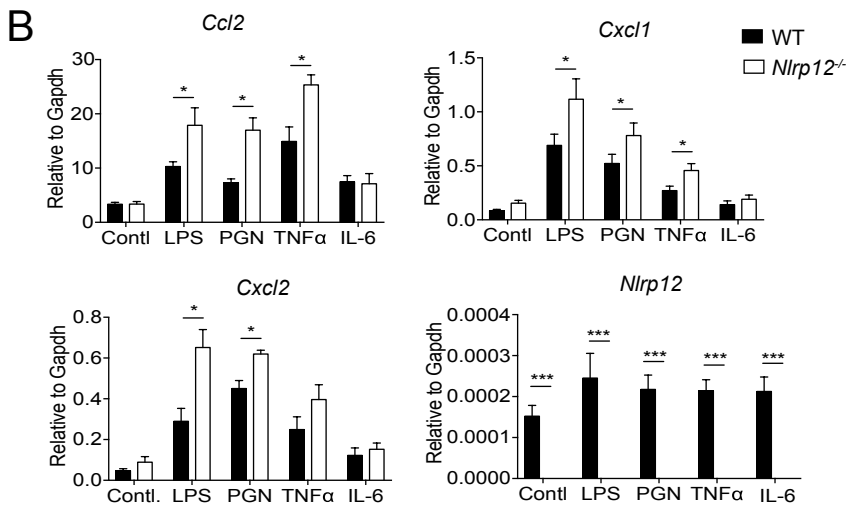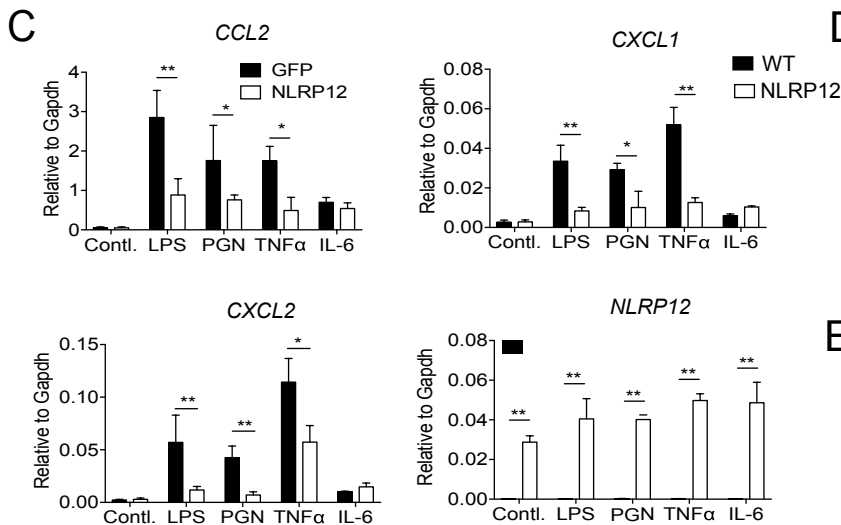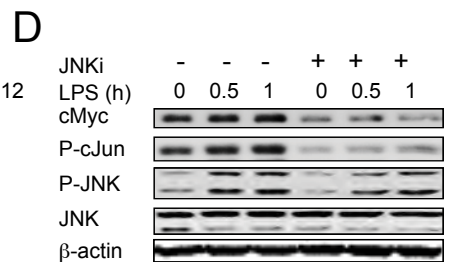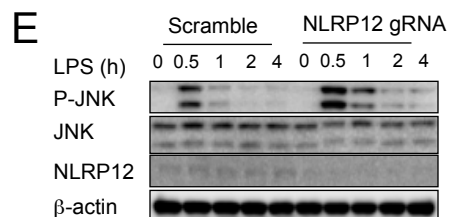

Supplement: supp [file elife-40396-supp-v1.zip]

A

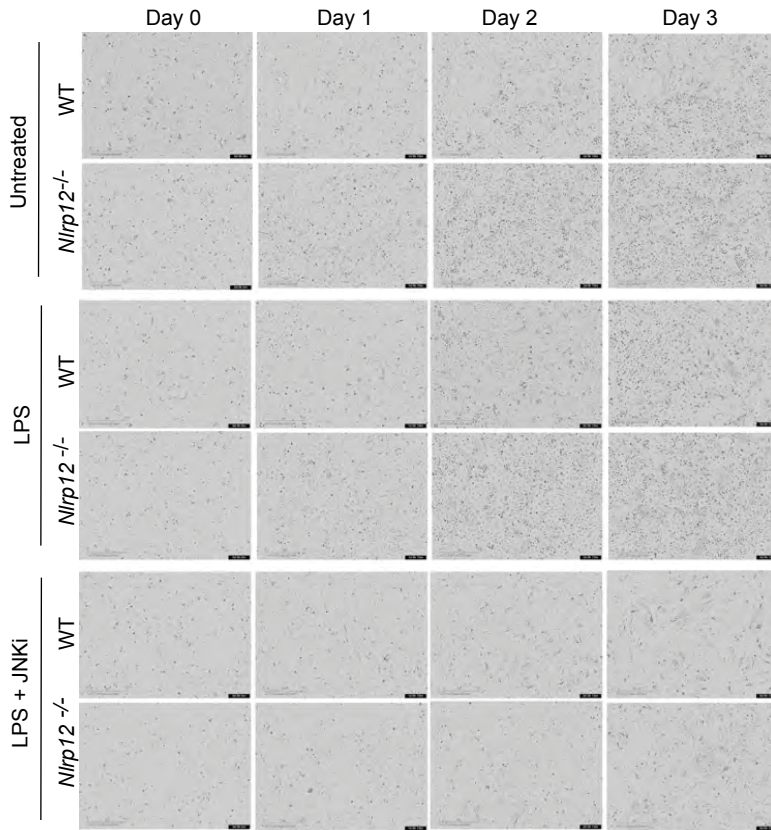

B

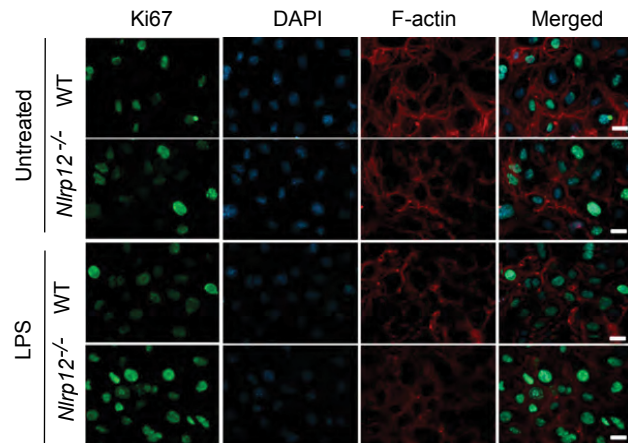

C

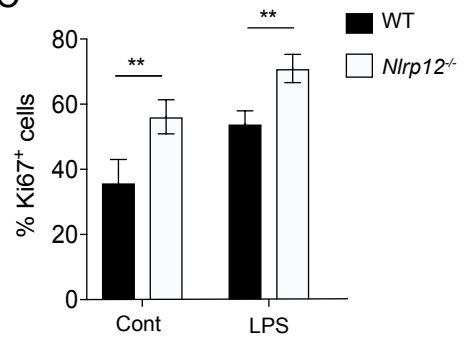

Supplement: supp [file elife-40396-supp-v1.zip]

Figure 2-figure supplement 1

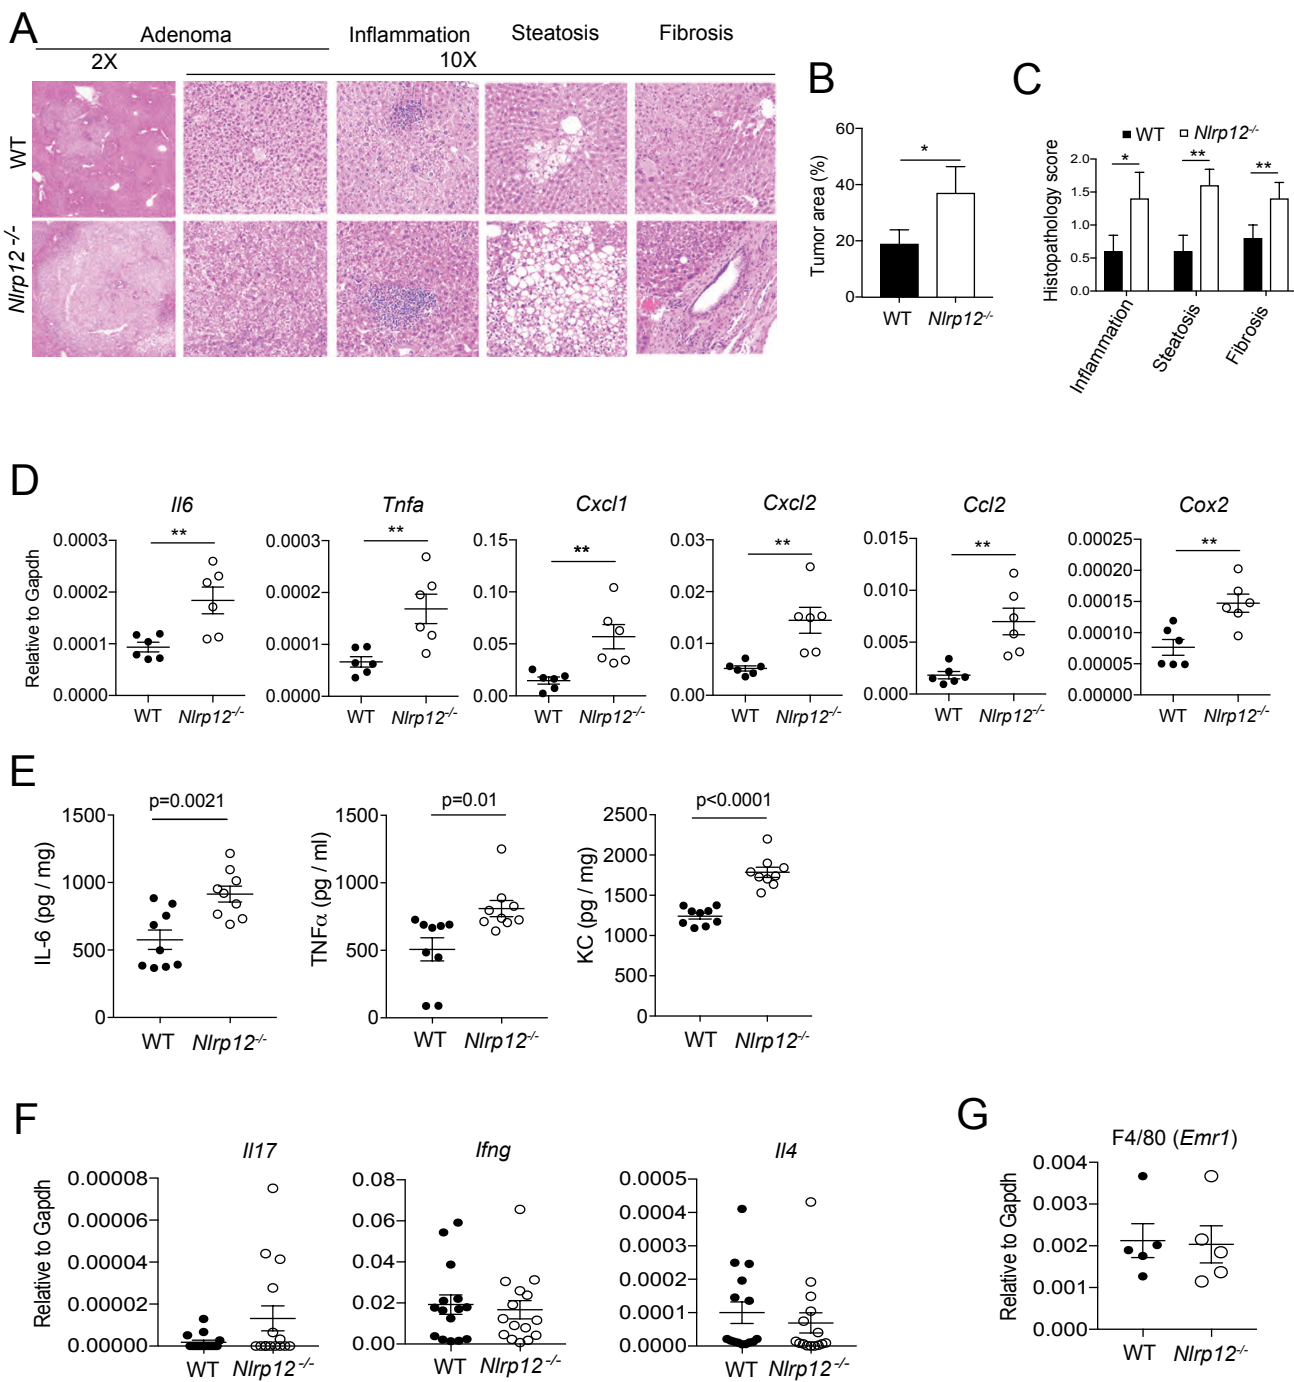

Supplement: supp [file elife-40396-supp-v1.zip]

Figure 5-figure supplement 1

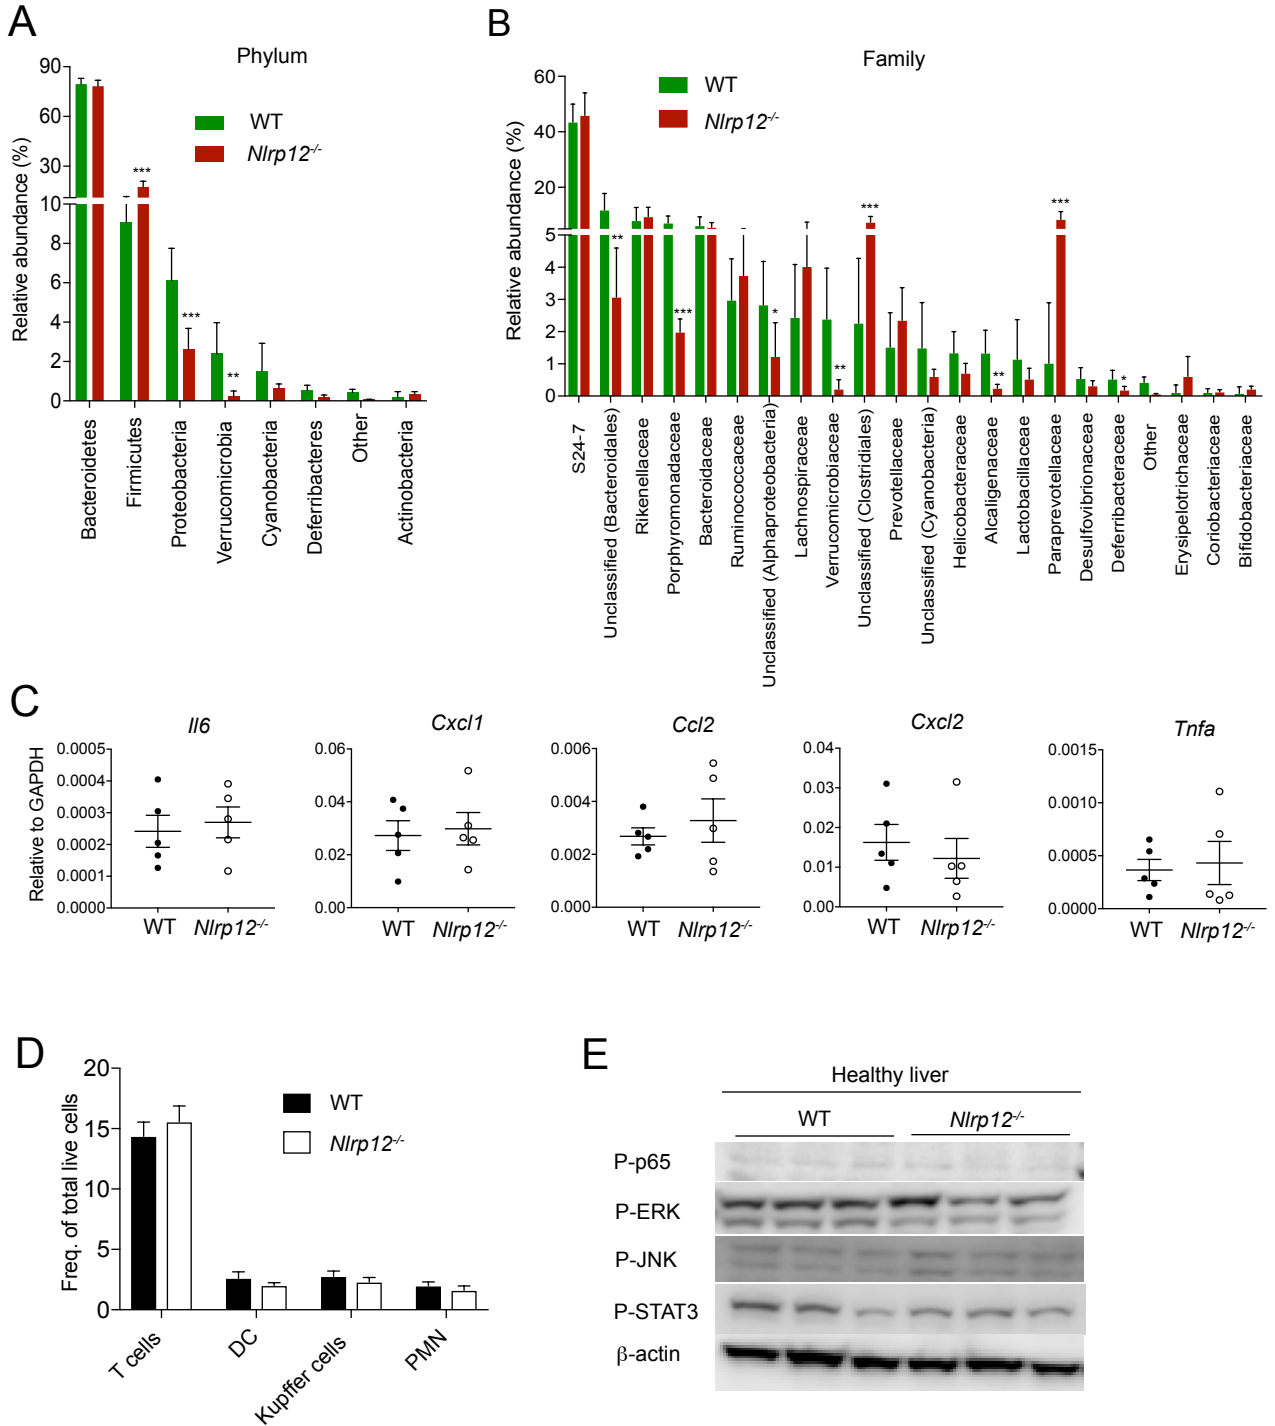

Supplement: supp [file elife-40396-supp-v1.zip]

Figure 3-figure supplement 1

A

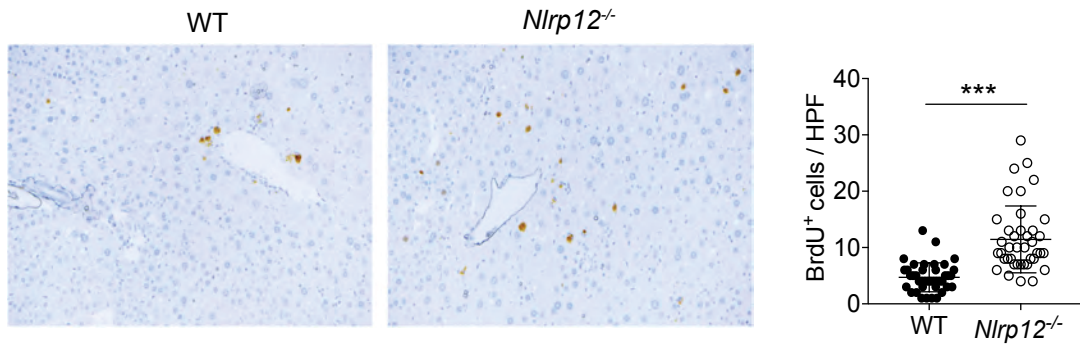

B

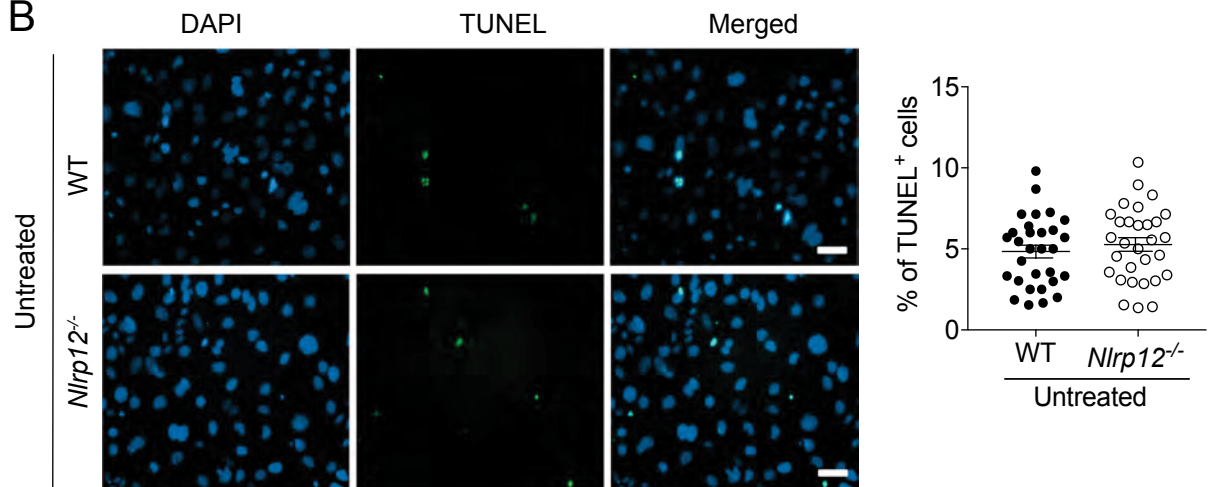

C

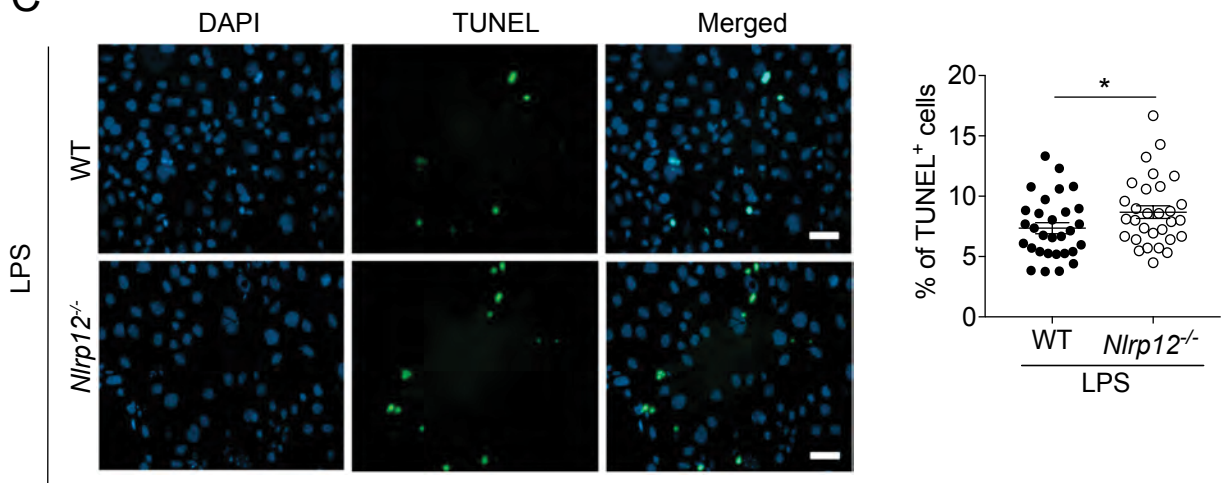

Supplement: supp [file elife-40396-supp-v1.zip]
